# Supplementary material
Source: Springer Nature journal article supplement (https://www.springermedizin.de/resource/supplementary/12985_2014_2396_MOESM4_ESM.pdf/9607022)

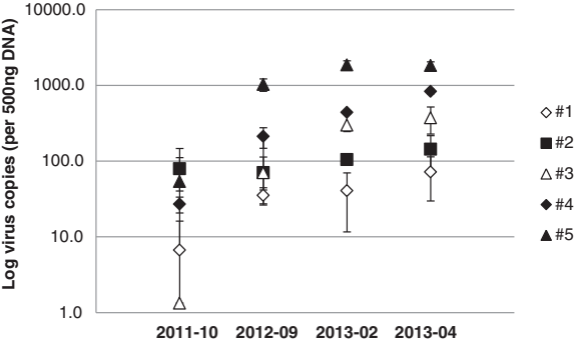

Supplement: MOESM4 [file 9607022]
